# Supplementary material for: A novel 3’,5’-diprenylated chalcone induces concurrent apoptosis and GSDME-dependent pyroptosis through activating PKCδ/JNK signal in prostate cancer
Source: publisher site journal article supplement (doi:10.18632/aging.103178), 2020-05-19
Supplement: Supplementary file [file aging-v12i10-103178-supplementary-material-SD1.pdf]

SUPPLEMENTARY FIGURES

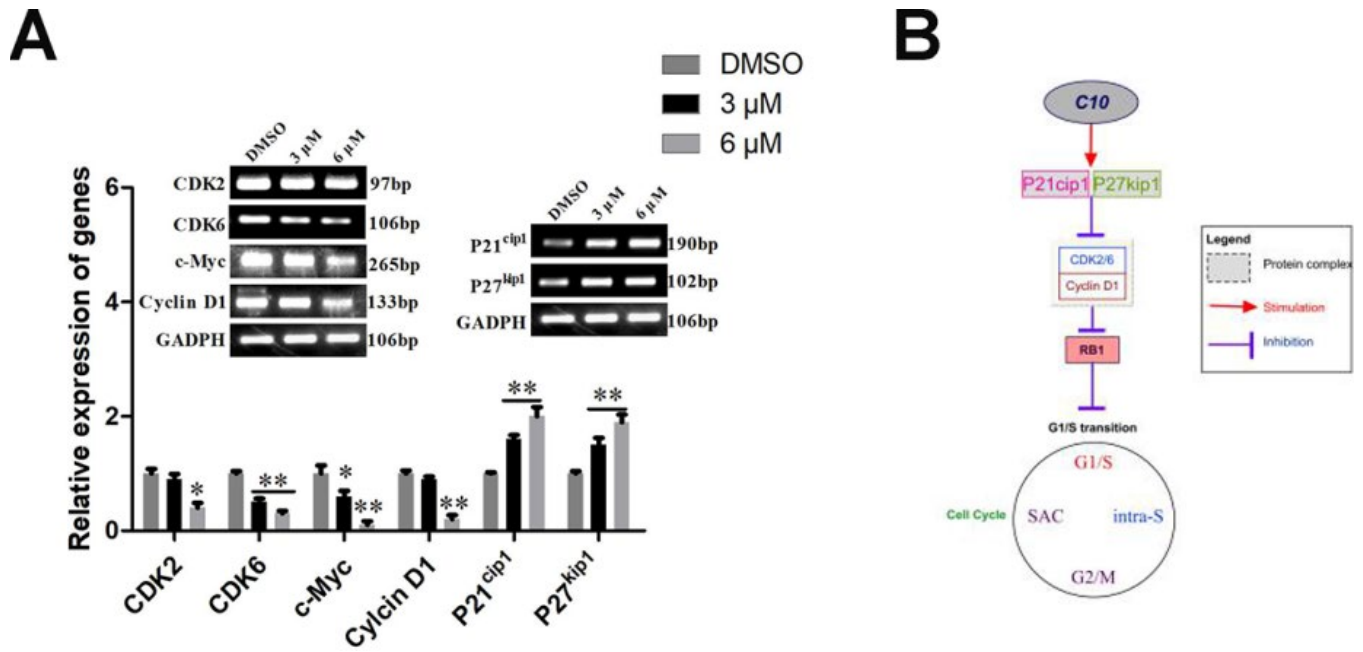

**Supplementary Figure 1. C10 induced sub-G1 phase cell cycle arrest in cultured PC3 cells.** (A) PC3 cells were exposed to C10 (3 or 6 μM) for 12 h, and core genes associated with the cell cycle, including CDK2, CDK6, c-Myc, Cyclin D1, P21<sup>cip1</sup> and P27<sup>kip1</sup> were measured by qRT-PCR. (B) Model depicting how C10 induced cell cycle arrest in sub-G1 phase by upregulating P21<sup>cip1</sup> and P27<sup>kip1</sup> and then downregulating CDKs and Cyclins. All data shown are representative of three independent experiments. \**P* < 0.05, \*\**P* < 0.01 vs. the control group.

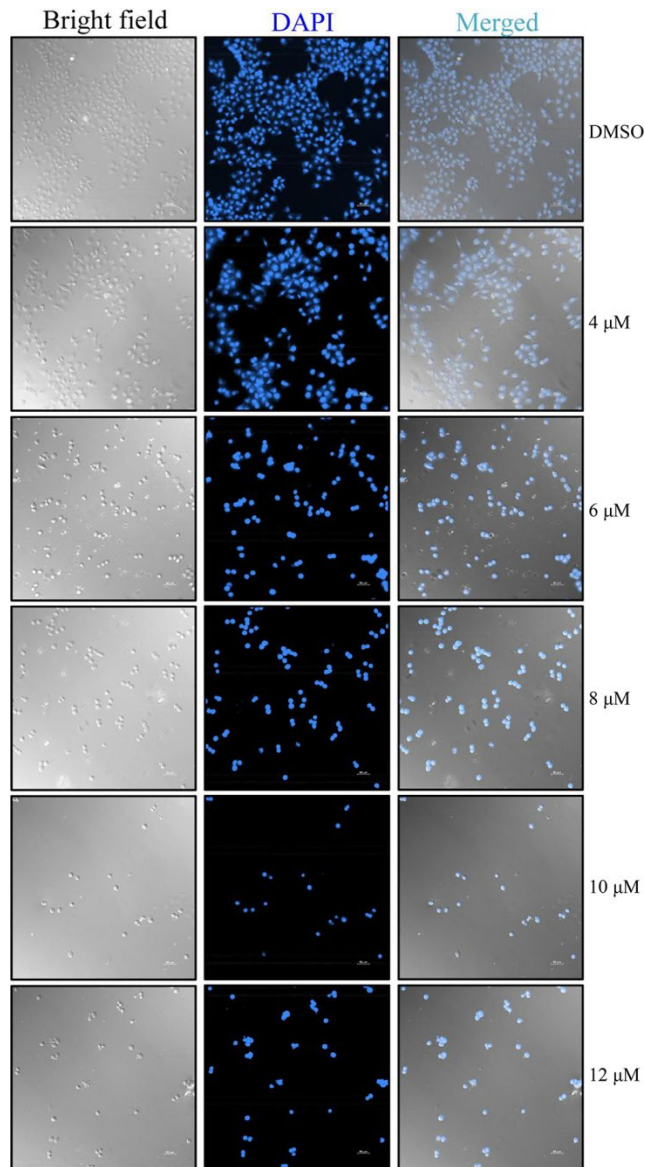

**Supplementary Figure 2. C10 induced apoptosis in PC3 cells.** PC3 cells were treated with the indicated concentrations of C10 (0, 4, 6, 8, 10 or 12 μM) for 24 h and then photographed using a fluorescence microscope. Images depict DAPI staining in the different groups (left, bright field; middle, DAPI staining; right, merged). Scale bar: 50 μm.

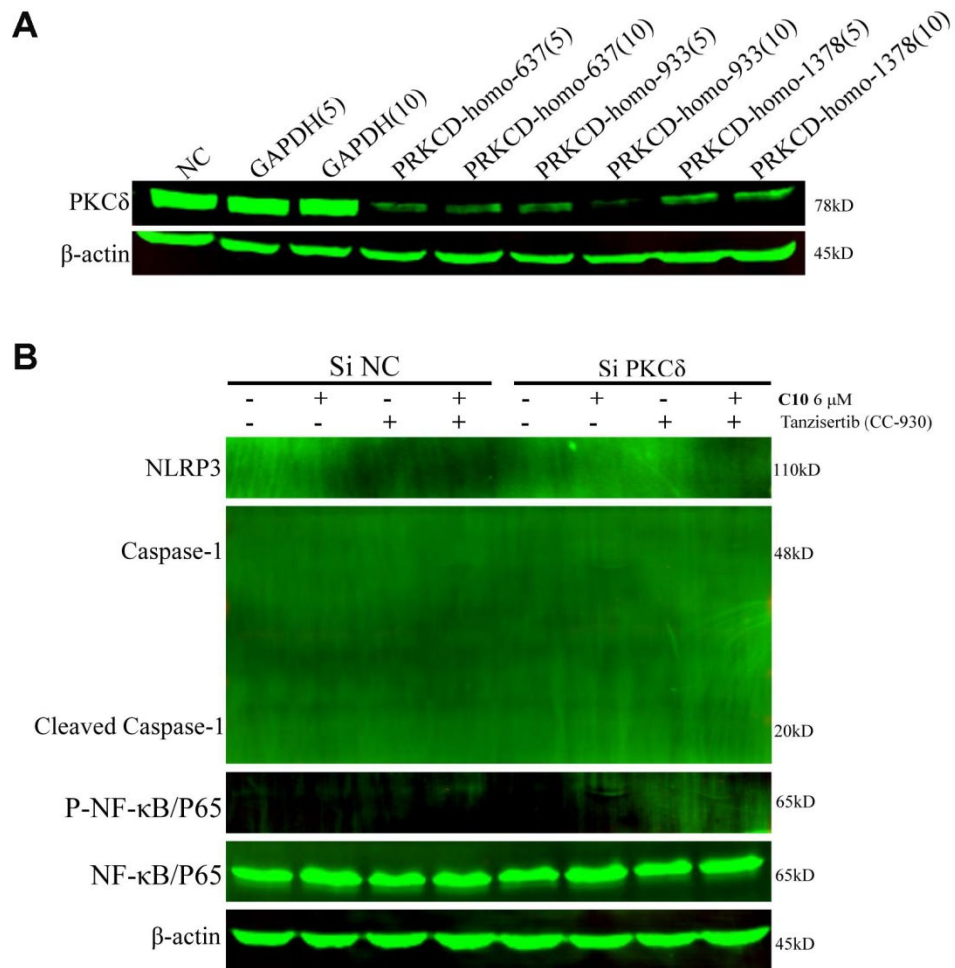

**Supplementary Figure 3. Effects of C10 on the canonical inflammatory Caspase-1 signaling pathway. (A)** PKC $\delta$  protein expression was detected in PC3 cells 48 h after transfection with siPKC $\delta$ , negative control siRNA or GAPDH. **(B)** Cultured PC3 cells were incubated with C10 in the presence of siPKC $\delta$  or the JNK-specific inhibitor Tanzisertib (CC-930) for 24 h. Then, the protein levels of NLRP3, Caspase-1, cleaved Caspase-1, p-NF- $\kappa$ B/P65 and NF- $\kappa$ B/P65 were detected by Western blotting.  $\beta$ -actin was used as a loading control.
